# Supplementary material
Source: publisher figshare collection journal article supplement (https://gsapubs.figshare.com/ndownloader/files/22747328)
Supplement: Supplementary file 1 [file 22747328]

## Cause and evolution of intraplate orogeny in Australia

S. Dyksterhuis and R. D. Müller

Supplemental data

| Location                        | 0 ~ 6 Ma | 6 ~ 11 Ma | 11 ~ 23 Ma | 23 ~ 25 Ma | 55 Ma | 100 Ma |
|---------------------------------|----------|-----------|------------|------------|-------|--------|
| Western Southeast Indian Ridge  | 3.10     | 3.10      | 2.46       | 2.46       | 1.08  | -      |
| Eastern Southeastern Ridge      | 1.90     | 1.90      | 1.36       | 1.36       | -     | -      |
| Australia Antarctic Discordance | 2.10     | 2.10      | 1.64       | 1.64       | 0.72  | -      |
| Papua New Guinea                | 4.00     | 4.00      | -          | -          | -     | -      |
| Banda Arc                       | - 2.50   | - 2.50    | -          | -          | -     | -      |
| Java                            | - 23     | - 23      | -23        | -23        | -     | -      |
| New Hebrides                    | 1.30     | 1.30      | -          | -          | -     | -      |
| Solomon                         | 1.00     | 1.00      | -          | -          | -     | -      |

|                                                      |      |      |       |       |       |        |
|------------------------------------------------------|------|------|-------|-------|-------|--------|
| Sumatra                                              | 2.00 | 2.00 | 2.00  | 2.00  | -     | -      |
| New Zealand                                          | 3.00 | 3.00 | 2.00  | -     | -     | -      |
| Australian/Pacific plate margin south of New Zealand | 1.50 | 0.75 | -     | -     | -     | -      |
| Ontong Plateau                                       | -    | -    | 1.50  | 1.50  | -     | -      |
| New Guinea Margin                                    | -    | -    | -2.00 | -2.00 | 1.00  | -      |
| Tasman Sea                                           | -    | -    | -     | -     | 1.10  | -      |
| Coral Sea                                            | -    | -    | -     | -     | 0.49  | -      |
| Northern Trench                                      | -    | -    | -     | -     | -2.00 | -      |
| Wharton Basin Ridge                                  | -    | -    | -     | -     | 3.10  | 2.32   |
| East Gondwanaland Subduction Zone                    | -    | -    | -     | -     | -     | -23.00 |

Appendix 1 Forces applied to models with times in millions of years before present. Positive forces are directed towards the interior of the plate. Note: Force magnitudes are  $1 \times 10^{12}$  N/m, which is equivalent to a stress of 10 MPa across a plate of thickness 100 km. See reconstructions (Figure 2) for locations of forces.

| Geological Province | Effective Elastic Plate Thickness (km) | Flexural Rigidity $\times 10^{25}$ N.m | Scaling Factor | Effective Young's Modulus $\times 10^{10}$ N/m <sup>2</sup> | Refined Effective Young's Modulus $\times 10^{10}$ N/m <sup>2</sup> | Refined Effective Rigidity $\times 10^{25}$ N.m | Refined Effective Elastic Plate Thickness (km) |
|---------------------|----------------------------------------|----------------------------------------|----------------|-------------------------------------------------------------|---------------------------------------------------------------------|-------------------------------------------------|------------------------------------------------|
| Adelaide Fold Belt  | -                                      | -                                      | -              | -                                                           | 0.30                                                                | 0.11                                            | 49                                             |
| Stuart Shelf        | -                                      | -                                      | -              | -                                                           | 0.80                                                                | 0.28                                            | 68                                             |
| Arunta Block        | 88                                     | 0.61                                   | 0.29           | 1.74                                                        | 3.70                                                                | 1.30                                            | 113                                            |
| Ngalia Basin        | 88                                     | 0.61                                   | 0.29           | 1.74                                                        | 3.70                                                                | 1.30                                            | 113                                            |
| Tennant Creek Block | 88                                     | 0.61                                   | 0.29           | 1.74                                                        | 3.70                                                                | 1.30                                            | 113                                            |
| Amadeus Basin       | -                                      | -                                      | -              | -                                                           | 0.70                                                                | 0.25                                            | 65                                             |
| Officer Basin       | -                                      | -                                      | -              | -                                                           | 0.70                                                                | 0.25                                            | 65                                             |
| Eucla Basin         | -                                      | -                                      | -              | -                                                           | 0.70                                                                | 0.25                                            | 65                                             |
| Darling Basin       | 29                                     | 0.02                                   | 0.01           | 0.06                                                        | 0.20                                                                | 0.07                                            | 42                                             |
| Murray Basin        | 29                                     | 0.02                                   | 0.01           | 0.06                                                        | 0.20                                                                | 0.07                                            | 42                                             |
| Bass Basin          | -                                      | -                                      | -              | -                                                           | 0.60                                                                | 0.21                                            | 61                                             |
| Rocky Cape Block    | -                                      | -                                      | -              | -                                                           | 0.60                                                                | 0.21                                            | 61                                             |
| Tasmania Basin      | -                                      | -                                      | -              | -                                                           | 0.60                                                                | 0.21                                            | 61                                             |
| Bassian Rise        | -                                      | -                                      | -              | -                                                           | 0.60                                                                | 0.21                                            | 61                                             |
| Sydney Basin        | -                                      | -                                      | -              | -                                                           | 0.60                                                                | 0.21                                            | 61                                             |
| Clarence-Moreton    | -                                      | -                                      | -              | -                                                           | 0.60                                                                | 0.21                                            | 61                                             |

|                         |     |      |      |      |      |      |     |
|-------------------------|-----|------|------|------|------|------|-----|
| Basin                   |     |      |      |      |      |      |     |
| Bowen Basin             | -   | -    | -    | -    | 0.60 | 0.21 | 61  |
| Maryborough Basin       | -   | -    | -    | -    | 0.60 | 0.21 | 61  |
| Galilee Basin           | -   | -    | -    | -    | 0.60 | 0.21 | 61  |
| Eromanga Basin          | -   | -    | -    | -    | 0.80 | 0.28 | 68  |
| Surat Basin             | -   | -    | -    | -    | 0.80 | 0.28 | 68  |
| Gawler Block            | 92  | 0.69 | 0.33 | 1.97 | 3.98 | 1.39 | 116 |
| Gippsland Basin         | -   | -    | -    | -    | 0.70 | 0.25 | 65  |
| Mt Isa Block            | 134 | 2.10 | 1.00 | 6.00 | 6.00 | 2.10 | 134 |
| Musgrave Block          | 88  | 0.61 | 0.29 | 1.74 | 3.74 | 1.31 | 114 |
| Coen-Yambo Block        | -   | -    | -    | -    | 5.70 | 2.00 | 131 |
| Daly River Basin        | -   | -    | -    | -    | 1.00 | 0.35 | 73  |
| Wiso Basin              | -   | -    | -    | -    | 1.00 | 0.35 | 73  |
| Georgia Basin           | -   | -    | -    | -    | 1.00 | 0.35 | 73  |
| McArthur Basin          | -   | -    | -    | -    | 1.00 | 0.35 | 73  |
| Arafura Basin           | -   | -    | -    | -    | 1.00 | 0.35 | 73  |
| Carpentaria Basin       | -   | -    | -    | -    | 1.00 | 0.35 | 73  |
| North Lachlan Fold Belt | 26  | 0.02 | 0.01 | 0.05 | 0.09 | 0.03 | 32  |
| Northwest Shelf         | -   | -    | -    | -    | 0.40 | 0.14 | 54  |

|                              |     |      |      |      |      |      |     |
|------------------------------|-----|------|------|------|------|------|-----|
| Halls Creek Province         | 134 | 2.10 | 1.00 | 6.00 | 6.00 | 2.10 | 134 |
| Pine Creek Geosyncline       | 134 | 2.10 | 1.00 | 6.00 | 6.00 | 2.10 | 134 |
| Bonaparte Gulf Basin         | -   | -    | -    | -    | 0.50 | 0.18 | 58  |
| Browse Basin                 | -   | -    | -    | -    | 0.50 | 0.18 | 58  |
| Canarvon Basin               | -   | -    | -    | -    | 0.40 | 0.14 | 54  |
| Otway Basin                  | -   | -    | -    | -    | 0.70 | 0.25 | 65  |
| Perth Basin                  | -   | -    | -    | -    | 0.30 | 0.11 | 49  |
| Pilbara Block                | 132 | 2.00 | 0.95 | 5.71 | 5.70 | 2.00 | 131 |
| Paterson Province            | 132 | 2.00 | 0.95 | 5.71 | 5.70 | 2.00 | 131 |
| Bremer Basin                 | -   | -    | -    | -    | 0.09 | 0.03 | 32  |
| Great Australian Bight Basin | -   | -    | -    | -    | 0.09 | 0.03 | 32  |
| South Lachlan Fold Belt      | 20  | 0.01 | 0.00 | 0.02 | 0.05 | 0.02 | 26  |
| Bangrall and Nabberu Basins  | -   | -    | -    | -    | 0.70 | 0.25 | 65  |
| Gascoyne Block               | -   | -    | -    | -    | 0.70 | 0.25 | 65  |
| Canning Basin                | -   | -    | -    | -    | 0.70 | 0.25 | 65  |
| Kimberly Basin               | -   | -    | -    | -    | 0.70 | 0.25 | 65  |
| Money Shoal Basin            | -   | -    | -    | -    | 0.70 | 0.25 | 65  |
| Victoria River Basin         | -   | -    | -    | -    | 0.70 | 0.25 | 65  |

|                              |     |      |      |      |      |      |     |
|------------------------------|-----|------|------|------|------|------|-----|
| Birrindudu and Tanami Basins | -   | -    | -    | -    | 0.70 | 0.25 | 65  |
| Albany-Fraser Province       | 132 | 2.00 | 0.95 | 5.71 | 5.70 | 2.00 | 131 |
| Yilgarn Block                | 132 | 2.00 | 0.95 | 5.71 | 5.70 | 2.00 | 131 |
| Eastern Continental Margin   | -   | -    | -    | -    | 0.02 | 0.01 | 19  |

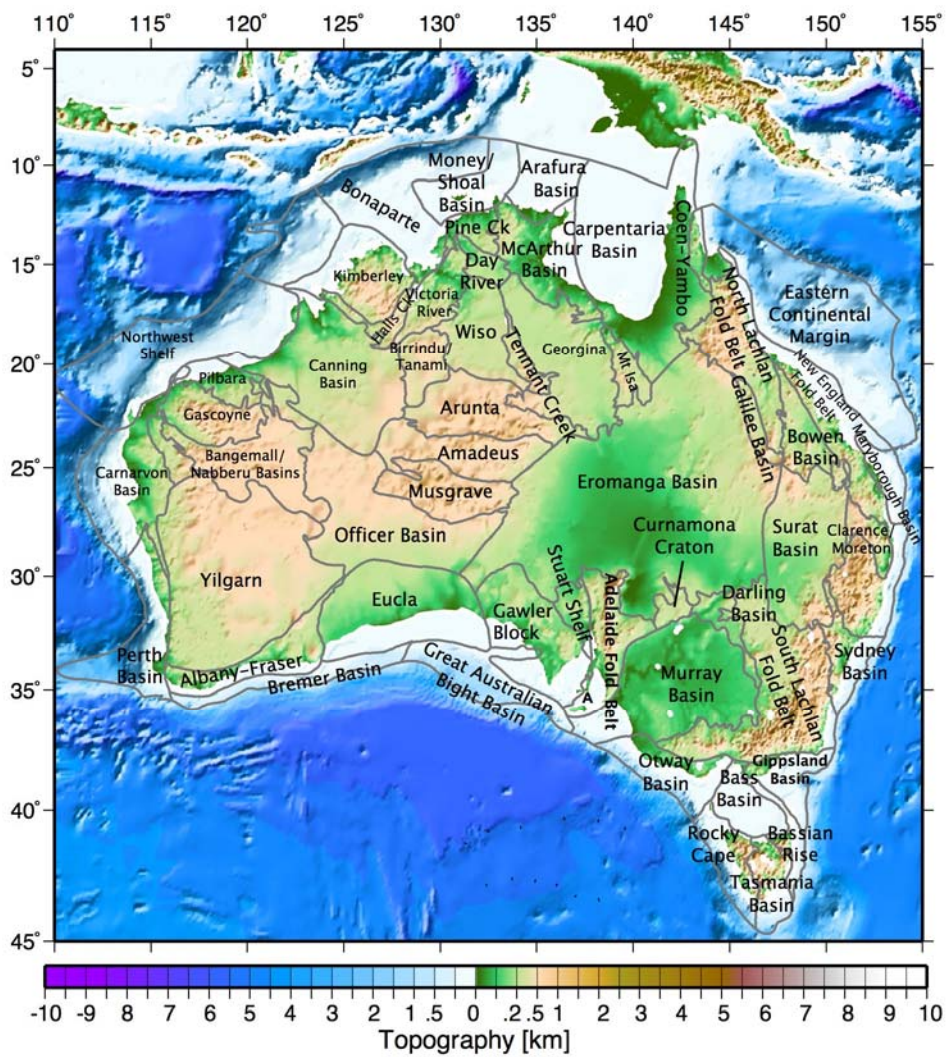

Appendix 2 Table of initial values for strength estimates of material parameters in columns one and two after Zuber et al. (1989); geological provinces correspond to labels on Figure as part of Appendix 2. Effective Young's modulus represent the value assigned to a material in the model after scaling. Refined values are the values obtained from the optimisation process that give a best fit with observational data and as such represent strengths optimised for the present day stress regime. The significant differences between the initial and refined effective Young's modulus in some regions may represent spatial aliasing in the initial values due to unsuitable window size and spacing used in the effective elastic plate thickness study of Zuber et al. (1989), with most regions representing small spatial areas that may not have been resolved correctly. Given the non-uniqueness of forward modelling and the non-linear interactions between stress directions, magnitudes and rheological provinces, aliasing of these regions in order to achieve the best fit with observed stress orientation overall cannot be ruled out.



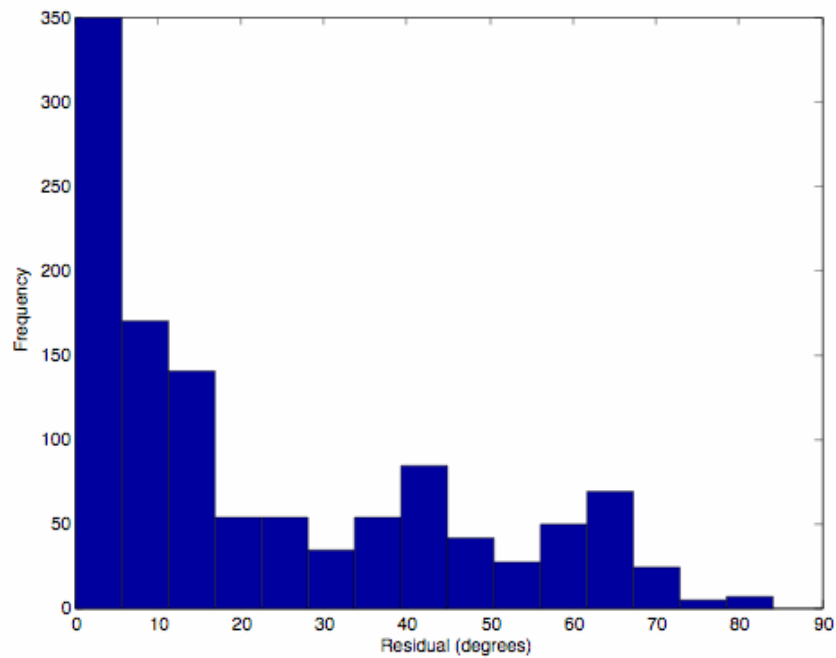

Appendix 3 Histogram showing total residual misfit of the “best fit” contemporary model with a median residual misfit value of  $\sim 12^\circ$ . Modelled  $\sigma_H$  orientations were averaged over a small window whose centre corresponded to the location of a  $\sigma_H$  orientation with A to B quality for various regions over the Australian continent and continental margin. The difference between azimuths of measured and average modelled  $\sigma_H$  orientations then determined the residual misfit.

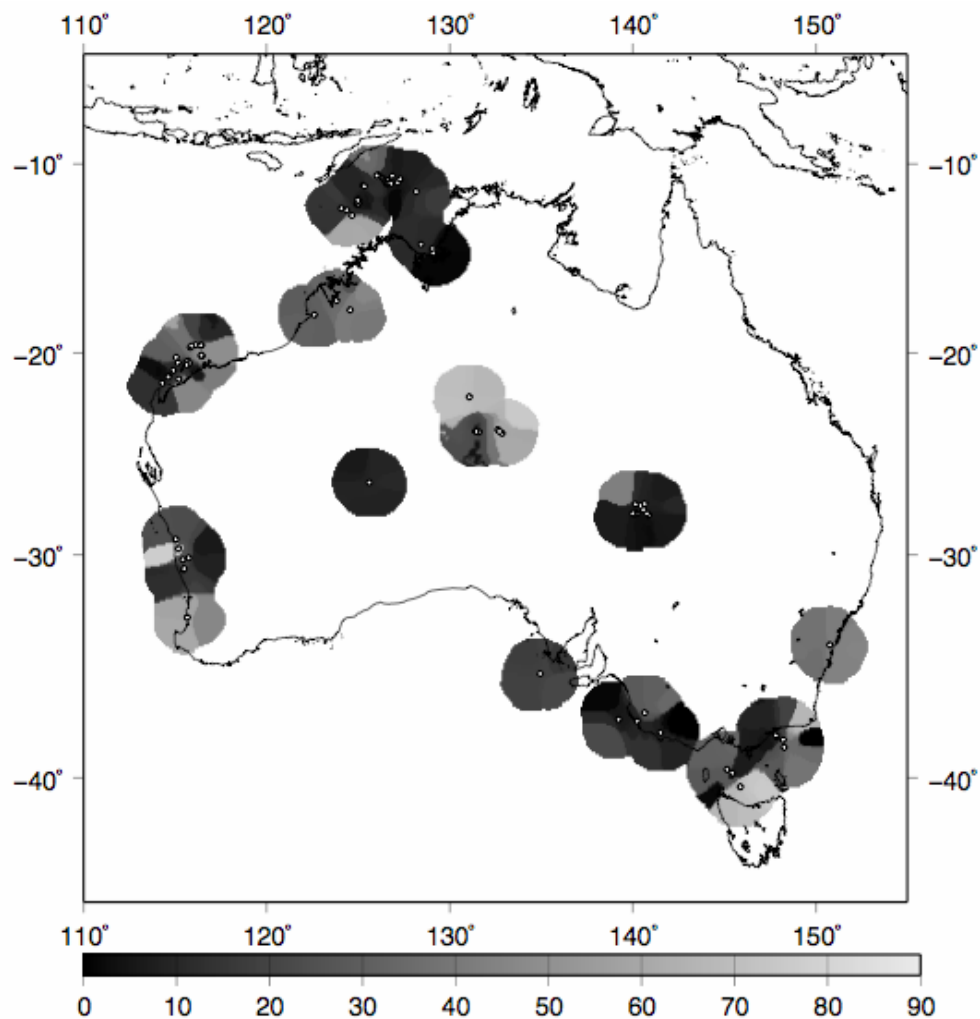

Appendix 4 Map of residual misfit with 100 km near neighbour interpolated misfit (in degrees) gridded around data points of the Australian Stress Map included in the optimisation process (white circles). Darker colours indicate a better fit between measured and modelled maximum horizontal stress directions. The fit of modelled stress orientations in some regions of Australia, in particular north-eastern Australia, remained unconstrained due to lack of any high quality data. The modelling process is intrinsically skewed towards optimising overall fit where there is the most data, and as such any interpretation using the

modelled results in regions at increasing distance from data points must consider this increasing uncertainty.

**Flinders**

| Time Period | Mean Azimuth | $\sigma_H$ | $\sigma_h$ | $\sigma_v$ | Regime |
|-------------|--------------|------------|------------|------------|--------|
|             |              |            |            |            |        |
| 6Ma - 0Ma   | 106          | 29         | 22         | 20         | R      |
| 11Ma- 6Ma   | 69           | 26         | 23         | 20         | R      |
| 23Ma - 11Ma | 118          | 42         | 11         | 20         | SS     |
| 25Ma - 23Ma | 114          | 33         | 11         | 20         | SS     |
| ~55Ma       | 85           | 34         | 22         | 20         | R      |
| ~100Ma      | 169          | 69         | -192       | 20         | SS     |

**Gippsland**

| Time Period | Mean Azimuth | $\sigma_H$ | $\sigma_h$ | $\sigma_v$ | Regime |
|-------------|--------------|------------|------------|------------|--------|
|             |              |            |            |            |        |
| 6Ma - 0Ma   | 129          | 28         | 21         | 20         | R      |
| 11Ma- 6Ma   | 90           | 26         | 23         | 20         | R      |
| 23Ma - 11Ma | 135          | 45         | 22         | 20         | R      |
| 25Ma - 23Ma | 133          | 36         | 22         | 20         | R      |
| ~55Ma       | 87           | 21         | 19.9       | 20         | SS     |

Appendix 5 Modelled mean maximum horizontal stress ( $\sigma_H$ ) direction and magnitude, modelled minimum horizontal stress ( $\sigma_h$ ) magnitude and estimated vertical stress ( $\sigma_v$ ) at roughly 1km depth for the Flinders Ranges and Gippsland Basin. Faulting Regime (R = reverse, SS = strike-slip, N = normal). Data for Flinders Ranges and Gippsland Basin averaged over a regions defined by 30°N, 34°S, 138°W, 140°E and 38°N, 39°S, 146°W, 149°E, respectively.
